# Supplementary material
Source: HighWire-hosted journal article supplement (https://bjo.bmj.com/content/108/3/336)
Supplement: inline-supplementary-material-1 [file inline-supplementary-material-1.pdf]

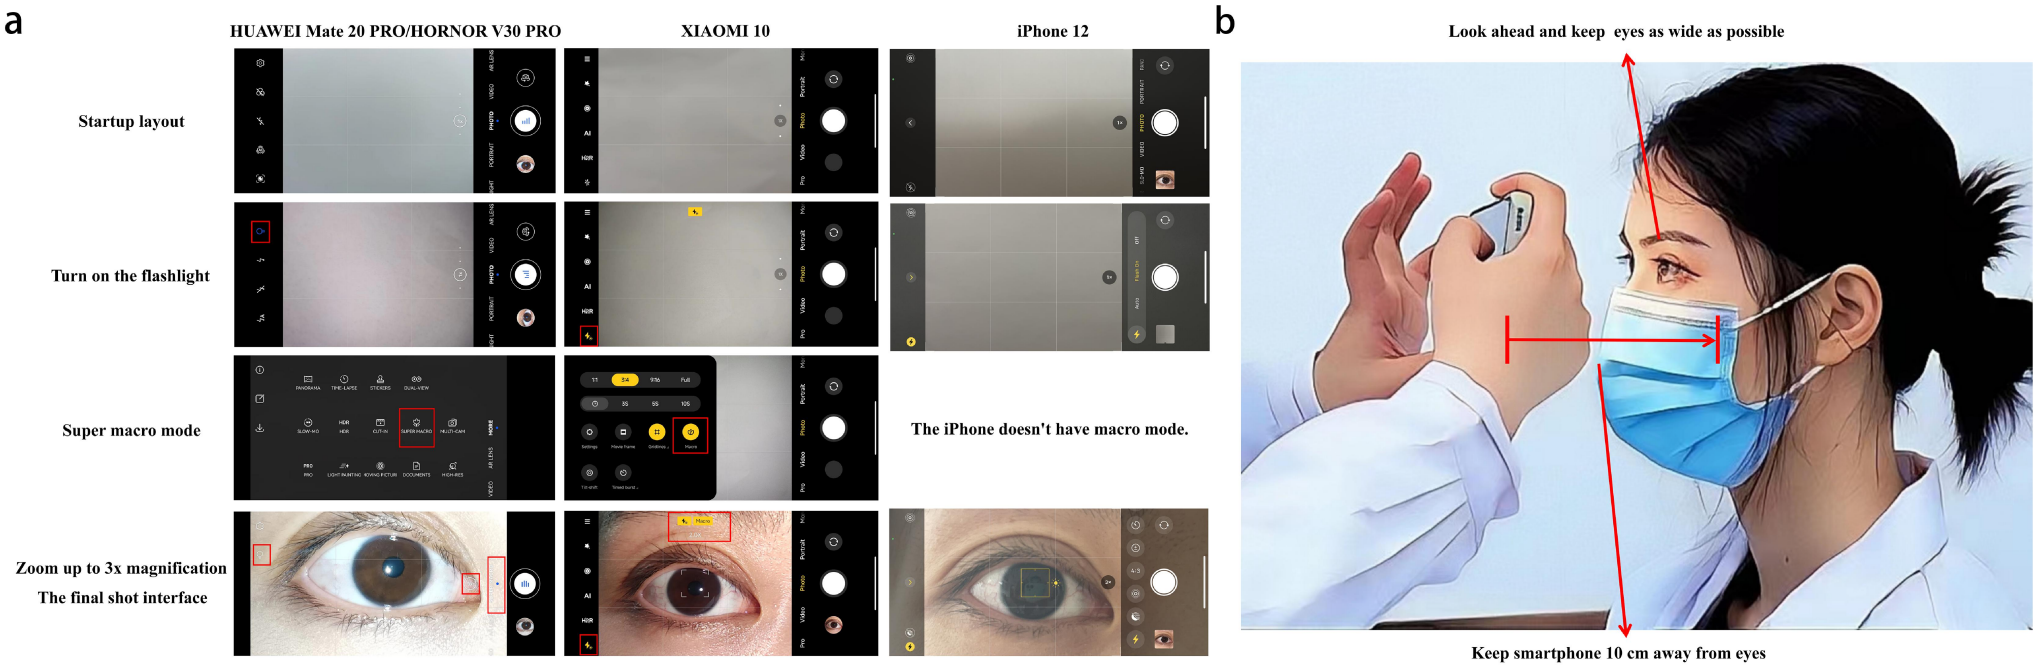

**Figure S1.** The specific models and detailed collecting protocol by smartphone. **a** Smartphone-specific operation details **b** Patient preparation

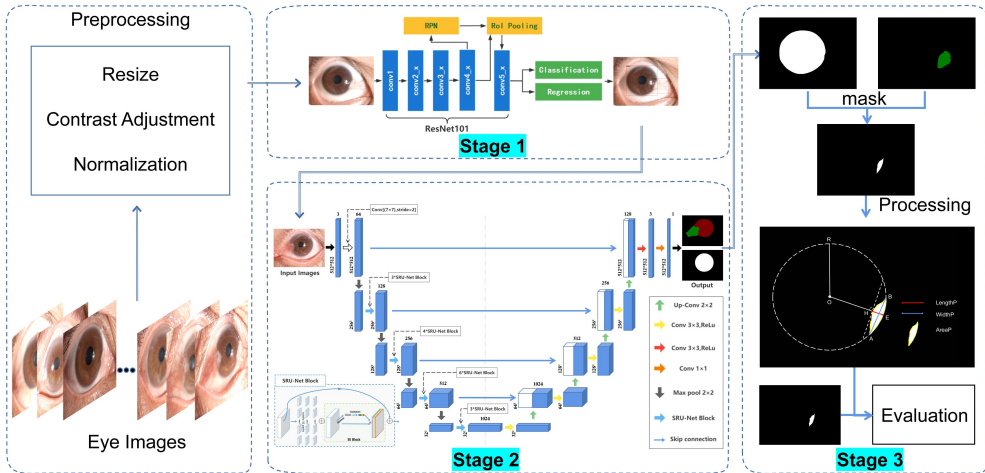

**Figure S2.** The framework of the automatic detection and grading of the pterygium system.

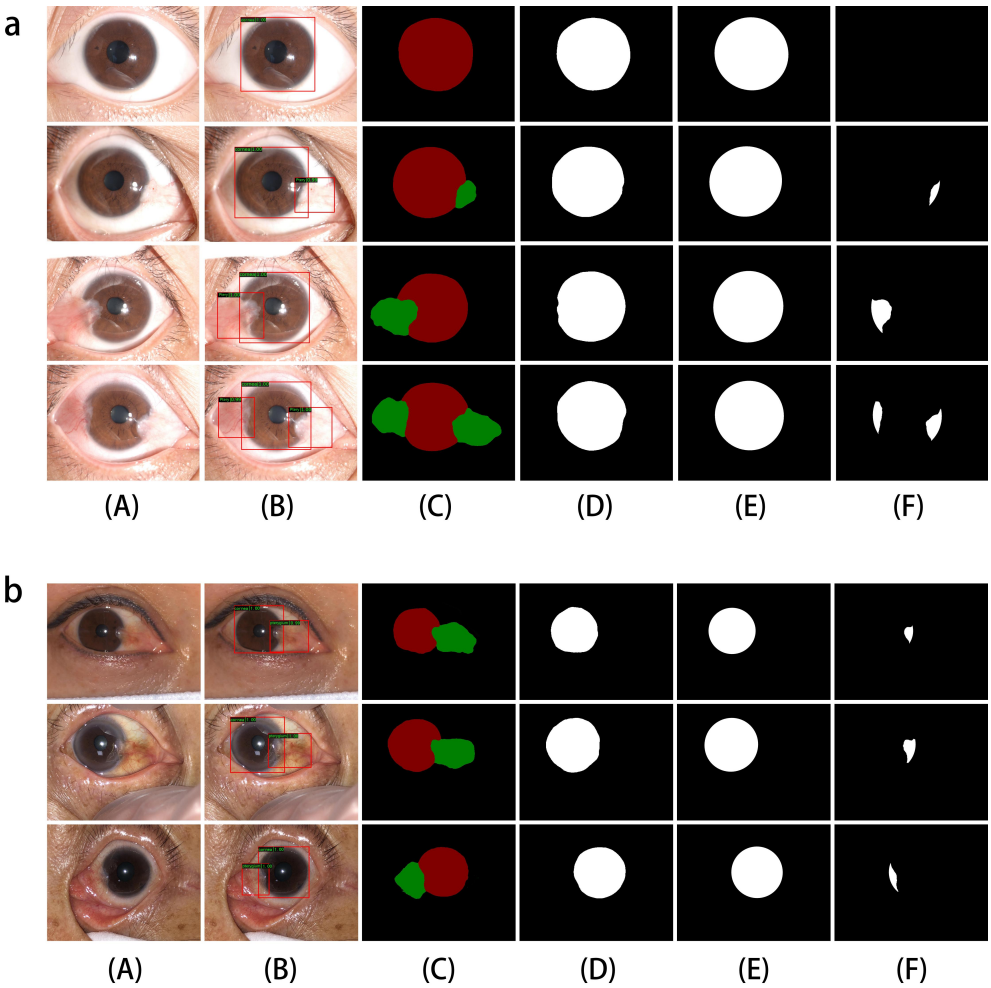

**Figure S3. The experimental results of original detection and segmentation images based on SLD and SPB. a** The experimental results from SLD. **b** The experimental results from SPB. **A-F** demonstrated the origin images, the detection results, the segmentation results of model Cornea-P, the segmentation results of model Cornea-S, the cornea fitting images, and the images of pterygium invading the cornea.

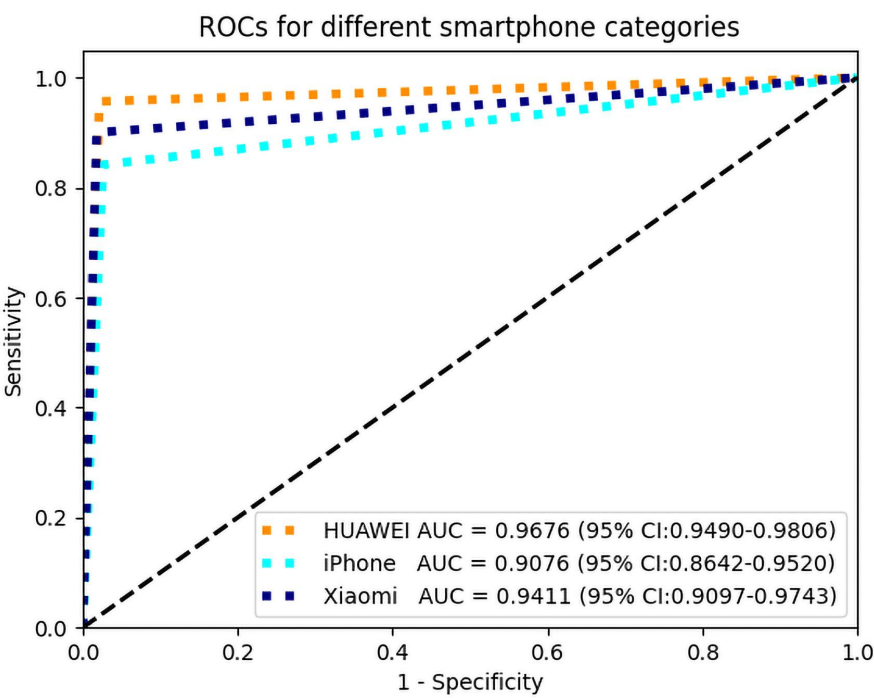

**Figure S4. ROC curve and AUC based on images of different smartphone brands in SPB.**



| Evaluation metrics | SLD    | SPB    |
|--------------------|--------|--------|
| mAP                | 0.9881 | 0.9563 |
| mIoU               | 0.9788 | 0.9100 |
| mAcc (%)           | 96.60  | 95.24  |

mAP, mean average precision; mIoU, mean intersection over union; mAcc, mean accuracy of pterygium detection.

**Table S1. Performance of DM in detecting pterygium based on SLD and SPB.**

| CLC       | SLD            |             |             |                           |        |         | SPB            |             |             |                           |        |         |
|-----------|----------------|-------------|-------------|---------------------------|--------|---------|----------------|-------------|-------------|---------------------------|--------|---------|
|           | F <sub>1</sub> | Sensitivity | Specificity | AUC (95% CI)              | Kappa  | Acc (%) | F <sub>1</sub> | Sensitivity | Specificity | AUC (95% CI)              | Kappa  | Acc (%) |
| Grade I   | 0.9526         | 0.9377      | 0.9852      | 0.9615<br>(0.9382-0.9819) |        |         | 0.8837         | 0.9157      | 0.9676      | 0.9416<br>(0.9119-0.9689) |        |         |
| Grade II  | 0.7586         | 0.9167      | 0.9592      | 0.9380<br>(0.9009-0.9726) |        |         | 0.8060         | 0.8182      | 0.9845      | 0.9013<br>(0.8452-0.9533) |        |         |
| Grade III | 0.9359         | 0.9060      | 0.9849      | 0.9455<br>(0.9234-0.9677) |        |         | 0.9027         | 0.8788      | 0.9483      | 0.9266<br>(0.9005-0.9497) |        |         |
| Micro-Avg | 0.9118         | 0.9201      | 0.9764      | 0.9478<br>(0.9262-0.9718) | 0.9193 | 92.11   | 0.8981         | 0.8709      | 0.9668      | 0.9295<br>(0.8952-0.9566) | 0.9086 | 88.31   |

AUC, area under receiver operating characteristic curve; Acc, accuracy of the system in pterygium grading for classification.

Table S2. Performance of SM3 in pterygium grading for classification in SLD and SPB.

|           | SLDS           |             |             |                           |        |         | SPBS           |             |             |                           |        |         |
|-----------|----------------|-------------|-------------|---------------------------|--------|---------|----------------|-------------|-------------|---------------------------|--------|---------|
|           | F <sub>1</sub> | Sensitivity | Specificity | AUC (95% CI)              | Kappa  | Acc (%) | F <sub>1</sub> | Sensitivity | Specificity | AUC (95% CI)              | Kappa  | Acc (%) |
| Grade I   | 0.9606         | 0.9531      | 0.9512      | 0.9522<br>(0.9346-0.9712) |        |         | 0.9683         | 0.9619      | 0.9524      | 0.9603<br>(0.9443-0.9750) |        |         |
| Grade II  | 0.7500         | 0.8571      | 0.9694      | 0.9133<br>(0.8468-0.9597) |        |         | 0.8400         | 1.0000      | 0.9619      | 0.9806<br>(0.9735-0.9886) |        |         |
| Grade III | 0.9538         | 0.9394      | 0.9861      | 0.9628<br>(0.9458-0.9808) |        |         | 0.8919         | 0.8462      | 0.9697      | 0.9079<br>(0.8796-0.9306) |        |         |
| Micro-Avg | 0.9448         | 0.9165      | 0.9689      | 0.9569<br>(0.9396-0.9764) | 0.8972 | 94.29   | 0.9313         | 0.9360      | 0.9613      | 0.9426<br>(0.9175-0.9618) | 0.8521 | 92.38   |

AUC, area under receiver operating characteristic curve; Acc, accuracy of the system in pterygium grading for classification; SLDS, slit-lamp images of the same group of patients; SPBS, smartphone-based images of the same group of patients.

Table S3. Performance of SM3 in pterygium grading of the same group of patients in SLDS and SPBS.

| CLC    | F <sub>1</sub> | Sensitivity | Specificity | AUC (95% CI)           | Acc (%) |
|--------|----------------|-------------|-------------|------------------------|---------|
| HUAWEI | 0.9549         | 0.8143      | 0.9729      | 0.9676 (0.9495-0.9829) | 95.65   |
| iPhone | 0.9331         | 0.8474      | 0.9738      | 0.9076 (0.8585-0.9485) | 84.13   |
| Xiaomi | 0.9586         | 0.8839      | 0.9823      | 0.9411 (0.9062-0.9708) | 90.00   |

**Table S4. Performance of SM3 in pterygium grading of three different smartphone brands.**

| CLC        | SPBO           | Sensitivity | Specificity | AUC (95% CI)           | Acc (%) |
|------------|----------------|-------------|-------------|------------------------|---------|
|            | F <sub>1</sub> |             |             |                        |         |
| Expert1    | 0.8532         | 0.8674      | 0.9168      | 0.9355 (0.9102-0.9562) | 91.40   |
| Expert2    | 0.9146         | 0.8619      | 0.9552      | 0.9597 (0.9412-0.9752) | 94.62   |
| Expert3    | 0.9235         | 0.9095      | 0.9616      | 0.9677 (0.9510-0.9827) | 95.70   |
| Expert-Avg | 0.8971         | 0.8129      | 0.9445      | 0.9543 (0.9379-0.9717) | 93.91   |
| System-Avg | 0.9248         | 0.7569      | 0.9624      | 0.9385 (0.9144-0.9620) | 88.52   |

Table S5. Comparison of the performance of SM3 and experts in grading of pterygium.
